# Supplementary material
Source: PubMed Central journal article supplement (PMC4490923)
Supplement: 10-1055-s-0035-1546172-sup_gf933.pdf [file 10-1055-s-0035-1546172-sup_gf933.pdf]

# Trastuzumab s. c. beim HER2-positiven Mammakarzinom – Evidenz und Erfahrungen aus der praktischen Anwendung in 7 deutschen Zentren

## Subcutaneous Trastuzumab for HER2-positive Breast Cancer – Evidence and Practical Experience in 7 German Centers

### Autoren

C. Jackisch<sup>1</sup>, V. Müller<sup>2</sup>, P. Dall<sup>3</sup>, R. Neumeister<sup>4</sup>, T.-W. Park-Simon<sup>5</sup>, A. Ruf-Dördelmann<sup>6</sup>, S. Seiler<sup>1</sup>, H. Tesch<sup>7</sup>, B. Ataseven<sup>8</sup>

### Institute

Die Institutsangaben sind am Ende des Beitrags gelistet.

### Schlüsselwörter

- Trastuzumab
- Mammakarzinom
- subkutane Therapie

### Key words

- trastuzumab
- breast cancer
- subcutaneous administration

### Zusammenfassung

Seit August 2013 steht für Patientinnen mit HER2-positivem Mammakarzinom die subkutane Applikationsform von Trastuzumab zur Verfügung, die in einer Fixdosis von 600 mg über rund 5 Minuten verabreicht wird. In der HannaH-Studie wurden in der neoadjuvanten Therapie eine vergleichbare Pharmakokinetik, Wirksamkeit und Verträglichkeit beider Applikationsformen von Trastuzumab gezeigt. Die randomisierte Crossover-Studie PrefHer wies eine deutliche Präferenz der Patientinnen für die subkutane Gabe von Trastuzumab gegenüber der intravenösen nach. In der begleitenden Time-and-Motion-Studie reduzierten sich unter der subkutanen Therapie die effektive Behandlungszeit der Patientinnen und der insgesamt für die Verabreichung von Trastuzumab notwendige Zeitaufwand des medizinischen Personals. Erfahrungen aus 7 deutschen Zentren decken sich weitgehend mit den Studienergebnissen. Vonseiten der Patientinnen bestand auch in der Praxis eine klare Präferenz für die subkutane Anwendung von Trastuzumab, wobei die Zeitersparnis durch die subkutane Anwendung als größter Vorteil wahrgenommen wurde. Trotz geringerer Vergütung aufgrund der bestehenden Abrechnungsmodalitäten fiel die Bilanz der Zentren für die subkutane Applikationsform von Trastuzumab positiv aus. Für sie bestand der wichtigste Vorteil in einer größeren Terminflexibilität, die in einigen Zentren zu einer Verbesserung einer angespannten Situation bei dünner Personaldecke und in Belastungsspitzen beitrug. Konsens war allerdings auch, dass die Vergütung onkologischer Behandlungen unbedingt angepasst werden muss, um eine Deckung des realen Betreuungsaufwands auch bei geänderten Applikationsformen zu gewährleisten.

### Abstract

A subcutaneous formulation of trastuzumab to treat patients with HER2-positive breast cancer is available since August 2013. The subcutaneous formulation is administered as a fixed dose of 600 mg over a period of up to 5 minutes. The HannaH trial compared subcutaneous with intravenous administration and found comparable pharmacokinetics, efficacy and tolerability for both administration forms of trastuzumab in the neoadjuvant setting. The randomized crossover study PrefHer reported a clear preference from the patient's point of view for subcutaneous over intravenous administration of trastuzumab. The accompanying time-and-motion study reported a reduction concerning the total time spent for the institution as well as for the patient receiving trastuzumab s.c.. The experience of 7 German centers largely corresponded with the results of these studies. Patients expressed a clear preference for subcutaneous trastuzumab administration, with the time saved by the subcutaneous administration route cited as the greatest benefit. Although the existing reimbursement terms mean that centers will receive a lower remuneration, the centers' overall evaluation of the subcutaneous administration route for trastuzumab was overwhelmingly positive. The greatest benefit cited by the centers was the flexibility in scheduling patient appointments. This increased flexibility improved conditions in some centers which were experiencing pressures due to a shortage of staff, particularly at peak times. The general consensus, however, was that the remuneration systems for oncological treatments urgently need to be amended to ensure that the real costs of treatment are covered, even if the administration route has changed.

eingereicht 17.4.2015

revidiert 18.5.2015

akzeptiert 18.5.2015

### Bibliografie

**DOI** <http://dx.doi.org/10.1055/s-0035-1546172>  
Geburtsh Frauenheilk 2015; 75:  
1–8 © Georg Thieme Verlag KG  
Stuttgart · New York ·  
ISSN 0016-5751

### Korrespondenzadresse

**Prof. Dr. Christian Jackisch**  
Sana Klinikum Offenbach  
Klinik für Gynäkologie  
und Geburtshilfe  
Starkenburgering 66  
63069 Offenbach  
[christian.jackisch@sana.de](mailto:christian.jackisch@sana.de)

## Einleitung

Die zielgerichtete Anti-HER2-Therapie mit dem monoklonalen Antikörper Trastuzumab (Herceptin®) ist heute sowohl im Frühstadium als auch in der metastasierten Situation Standard in der Behandlung von Patientinnen mit einem HER2-positiven Mammakarzinom [1–5]. Patientinnen mit einem frühen Mammakarzinom erhalten Trastuzumab als adjuvante Therapie über insgesamt 1 Jahr [4–6]. Bei Patientinnen mit metastasiertem Mammakarzinom wird die Behandlung mit Trastuzumab in der Regel mindestens bis zur Progression oder als „Treatment beyond progression“ auch darüber hinaus fortgeführt [5].

Bis vor Kurzem konnte die Therapie mit Trastuzumab nur intravenös entweder in 3-wöchentlichen oder in wöchentlichen Intervallen in einer an das Körpergewicht der Patientin angepassten Dosierung erfolgen. Die notwendige Rezeptorsättigung wird dabei mit einer höheren Loading Dose erreicht und nachfolgend mit niedrigeren Dosen aufrechterhalten [6].

Seit August 2013 steht Patientinnen mit HER2-positivem Mammakarzinom eine in der praktischen Anwendung zeitsparende subkutane (s.c.) Applikationsform von Trastuzumab zur Verfügung. Trastuzumab s.c. (Herceptin® SC) wird unabhängig vom Körpergewicht der Patientin und ohne initiale Aufsättigungsdosis in einer Fixdosis von 600 mg angewandt. Es wird über 5 Minuten subkutan verabreicht [7], während die Infusionsdauer bei der intravenösen Gabe 90 Minuten für die erste und 30 Minuten für die folgenden Infusionen beträgt [6]. Die Nachbeobachtungszeit ist für beide Applikationen identisch [6, 7].

Diese Arbeit gibt eine Übersicht zu den Studiendaten zur subkutanen Applikationsform Trastuzumab und zieht Bilanz über eine 18-monatige Anwendung in der klinischen Routine in 7 deutschen Zentren.

## Entwicklung der subkutanen Applikationsform von Trastuzumab

Das Volumen der subkutanen Injektionslösung von Trastuzumab s.c. beträgt 5 ml. Normalerweise ist die Injektion größerer Volumina als 2 ml durch die Physiologie der extrazellulären Matrix des Subkutangewebes limitiert und schmerzhaft [8]. Bei Trastuzumab s.c. ermöglicht die Koformulierung mit rekombinanter Hyaluronidase (rHuPH20) eine temporäre Aufhebung dieser Schranke aus Faserproteinen mit Hyaluronsäure, weiteren Glykosaminglykanen und komplexen linearen Polysacchariden und damit eine problemlose und schmerzarme subkutane Anwendung [7–11].

Um eine möglichst einfache Handhabung zu gewährleisten und Dosierungsfehler auszuschließen, wurde für die subkutane Anwendung von Trastuzumab eine vom Körpergewicht unabhängige fixe Dosierung entwickelt. Mit der Fixdosis von 600 mg wird eine adäquate Wirkstoffkonzentration im Blut und Rezeptorsättigung mit Trastuzumab bereits ab Zyklus 1 erreicht [12]. Das zugrunde liegende pharmakokinetische Modell konnte retrospektiv mit den pharmakokinetischen Daten der randomisierten Phase-III-Studie HannaH validiert werden [12, 13].

In der HannaH-Studie erhielten 596 Patientinnen mit HER2-positivem, nicht metastasiertem, lokal fortgeschrittenem oder inflammatorischem Mammakarzinom eine neoadjuvante Chemotherapie. Zusätzlich wurde Trastuzumab entweder in der fixen Dosierung von 600 mg subkutan (n = 297) oder intravenös (8 mg/kg Initialdosis, 6 mg/kg Erhaltungsdosis) (n = 299) alle

3 Wochen verabreicht. Nach der Operation wurde bis zur Komplettierung von 18 Zyklen die Therapie mit Trastuzumab fortgeführt. Die Studie zeigte für beide Darreichungsformen von Trastuzumab eine vergleichbare Pharmakokinetik sowie eine äquivalente Wirksamkeit und Verträglichkeit [14, 15].

Die unmittelbar vor der Operation gemessene Wirkstoffkonzentration im Blut, das geometrische Mittel der Talkonzentration ( $C_{\text{trough}}$ ), lag in der Gruppe mit subkutaner Applikation bei 69,0 µg/ml und in der i.v. Gruppe bei 51,8 µg/ml, der Quotient der beiden Werte mit 1,33 (90%-Konfidenzintervall [KI] 1,24–1,44) über der vorab definierten Nichtunterlegenheitsgrenze von 0,80 [14].

In dem Studienarm, in dem die Patientinnen Trastuzumab s.c. erhielten, erreichten 45,4% eine pathologische Komplettremission (pCR), im Arm mit intravenöser Trastuzumab-Gabe 40,7% der Patientinnen [14].

Die Inzidenz unerwünschter Ereignisse inklusive der Ereignisse  $\geq$  Grad 3 war in beiden Armen vergleichbar. Unter der s.c. Anwendung war die Inzidenz von schweren unerwünschten Ereignissen (SAEs) etwas höher (21,5%; 95%-KI 17,0–26,7%) als unter der intravenösen Gabe (14,1%; 95%-KI 10,4–18,6%). Es zeigte sich kein Zusammenhang zwischen Toxizität und Körpergewicht oder Trastuzumab-Exposition [15].

Eine weitere Auswertung vom ASCO 2015 zeigt, dass das Erreichen einer tpCR (definiert als die Abwesenheit invasiver Tumorzellen in Brust und Axilla) unabhängig von der Applikationsform von Trastuzumab in einem signifikant besseren ereignisfreien Überleben resultiert (Vergleich tpCR vs. keine tpCR: HR 0,38, 95%-KI 0,22–0,65 für s.c.; HR 0,32, 95%-KI 0,18–0,60 für i.v.) [16]. Das Sicherheitsprofil von Trastuzumab s.c. wird derzeit zusätzlich in der internationalen SafeHer-Studie (ClinicalTrials.gov, Nummer: NCT01566721) überprüft, einer großen nicht randomisierten Phase-III-Studie mit 2500 Patientinnen mit frühem Mammakarzinom in 2 Kohorten für die assistierte Applikation mittels Spritze und die Selbstapplikation mit Einweg-Injektionsgerät [17].

## PrefHer-Studie – Erfahrungen von Patientinnen und medizinischem Fachpersonal

In der randomisierten 2-Kohorten-Crossover-Studie PrefHer wurden die Präferenz von Patientinnen für die subkutane oder die intravenöse Anwendungsform von Trastuzumab sowie die Zufriedenheit des medizinischen Fachpersonals mit beiden Behandlungsoptionen systematisch überprüft. Dabei waren auch die subkutane Applikation mithilfe einer Spritze oder eines Einweg-Injektionsgeräts sowie Zeit- und Ressourcenbedarf der alternativen Verabreichungsformen Untersuchungsgegenstand [18, 19]. Die Patientinnen (n = 488) wurden nach Operation und abgeschlossener (neo-)adjuvanter Chemotherapie randomisiert. In Arm A (n = 245) erhielten sie im Rahmen ihrer adjuvanten Trastuzumab-Therapie 4 Zyklen Trastuzumab s.c. (600 mg alle 3 Wochen) gefolgt von 4 Zyklen Trastuzumab intravenös (6 mg/kg alle 3 Wochen). In Arm B (n = 243) wurden sie in umgekehrter Reihenfolge zunächst mit 4 Zyklen Trastuzumab i.v. (Initialdosis 8 mg/kg, ab Zyklus 2 6 mg/kg alle 3 Wochen) gefolgt von 4 Zyklen Trastuzumab s.c. (600 mg alle 3 Wochen) behandelt. In Kohorte 1 wurde Trastuzumab s.c. mittels eines Einweg-Injektionsgeräts verabreicht, in Kohorte 2 erfolgte die Injektion mit einer Spritze. Nach der Crossover-Periode über 8 Zyklen wurde die Therapie in Kohorte 1 mit Trastuzumab intravenös, in Kohorte 2 mit mittels

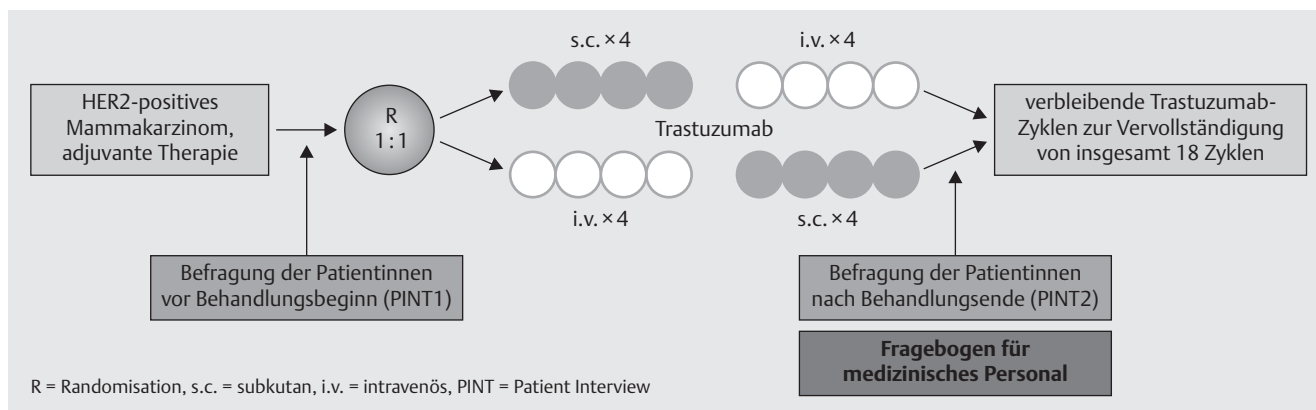

Abb. 1 Studiendesign der PrefHer-Studie (nach [18, 19]).

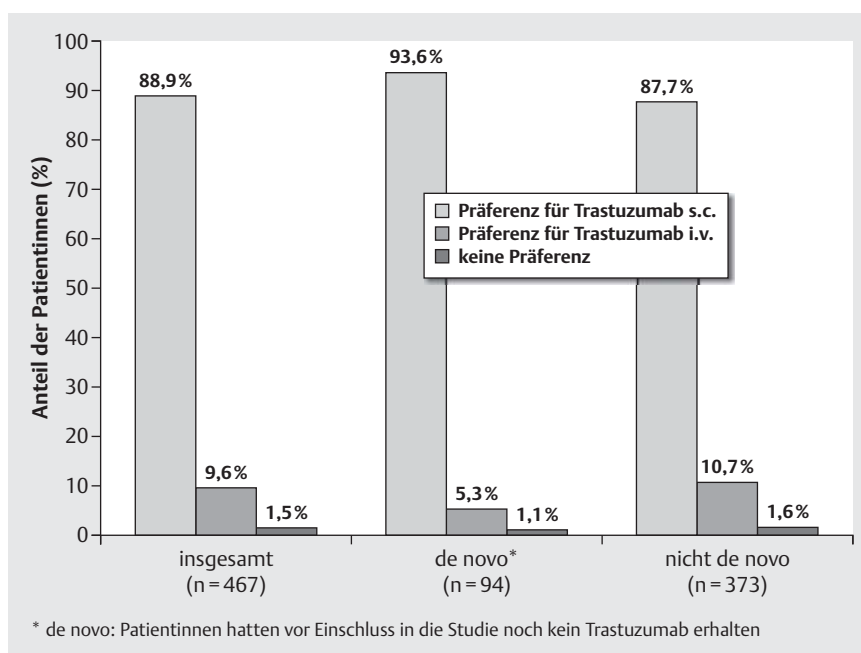

Abb. 2 Präferenz der Patientinnen für eine bestimmte Applikationsform von Trastuzumab (nach [19]).

Spritze subkutan verabreichtem Trastuzumab bis zur Gesamttherapiedauer von 18 Zyklen bzw. 12 Monaten vervollständigt (Abb. 1) [19].

Die Ergebnisse zeigten eine signifikante Präferenz der Patientinnen für die subkutane Applikation von Trastuzumab. 88,9% der Patientinnen bevorzugten die subkutane Applikation gegenüber der intravenösen (95%-KI 85,7–91,6%;  $p < 0,0001$ ), 9,6% bevorzugten die intravenöse Gabe und 1,5% hatten keine Präferenz (Abb. 2) [19].

Die Ergebnisse waren in beiden Armen d.h. unabhängig von der Sequenz s.c. → i.v. oder i.v. → s.c. konsistent. Die Präferenz für die subkutane Gabe von Trastuzumab wurde von 64,9% der Patientinnen als sehr stark, von 17,3% als ziemlich stark und von 6,6% als nicht sehr stark angegeben. Sowohl Patientinnen mit einer bereits vor Beginn der Therapie bestehenden Präferenz für die subkutane Verabreichung gaben nach der Crossover-Periode eine Präferenz für die s.c. Gabe an (203/216, 94,0%) als auch Patientinnen, die zuvor eine Präferenz für i.v. oder keine Präferenz geäußert hatten (212/251, 84,5%). Als wichtigsten Grund ihrer Präferenz für die subkutane Verabreichung von Trastuzumab nannten

Tab. 1 Primärgründe für die Präferenz der Patientinnen (evaluierbare ITT-Population) (nach [19]).

| Grund                                                                     | n (%)      |
|---------------------------------------------------------------------------|------------|
| <b>Präferenz für s. c., n = 756 Gründe angegeben von 415 Patientinnen</b> |            |
| Zeitersparnis                                                             | 375 (80,3) |
| weniger Schmerzen/Beschwerden/Nebenwirkungen                              | 160 (34,3) |
| leichtere Anwendbarkeit                                                   | 62 (13,3)  |
| bequemere Anwendung für die Patientin                                     | 57 (12,2)  |
| Problem bei der i. v. Anwendung                                           | 51 (10,9)  |
| weniger Stress/Angst                                                      | 35 (7,5)   |
| andere                                                                    | 20 (4,3)   |
| <b>Präferenz für i. v., n = 64 Gründe angegeben von 45 Patientinnen</b>   |            |
| weniger Reaktionen (Schmerzen, Quetschungen, Irritationen, etc.)          | 33 (7,1)   |
| andere/weiß nicht genau                                                   | 10 (2,1)   |
| psychologische                                                            | 9 (1,9)    |
| wahrgenommene Wirksamkeit                                                 | 6 (1,3)    |
| Umwelt/Personal                                                           | 5 (1,1)    |
| ökologische Überlegungen                                                  | 1 (0,2)    |

ITT = intention-to-treat; s. c.: subkutan; i. v.: intravenös.

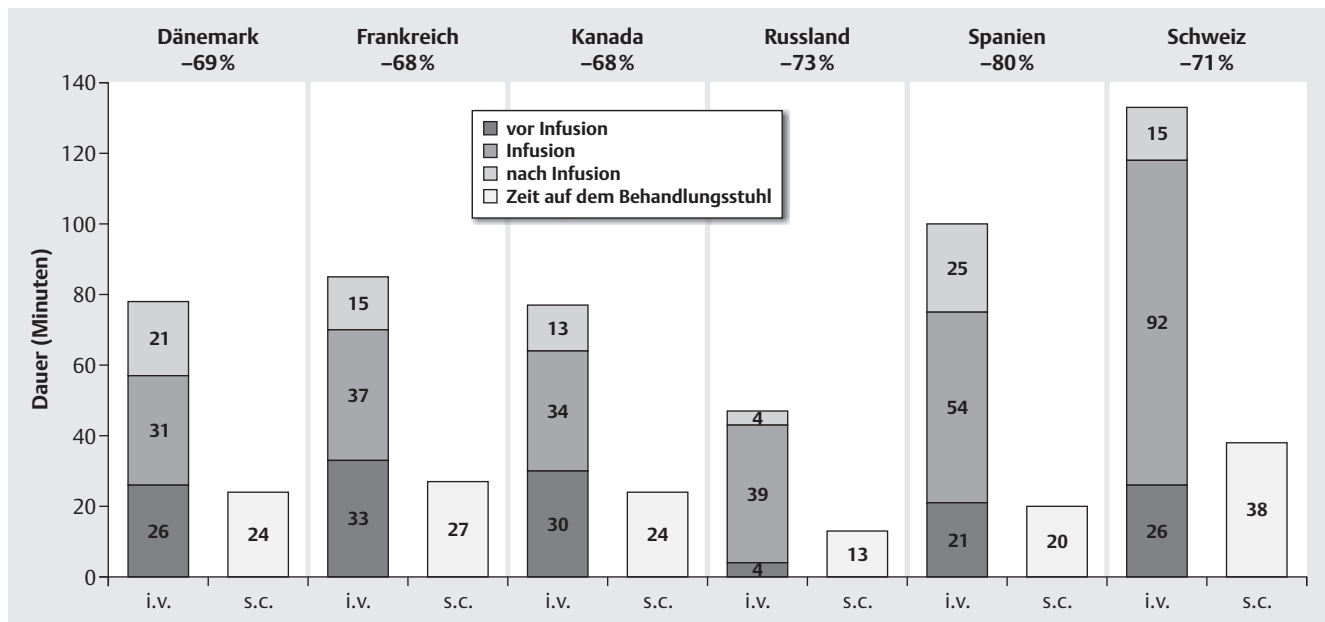

**Abb. 3** Zeit einer Patientin im Behandlungsstuhl („Patient Chair Time“) – s.c. Gabe\* vs. i.v. Gabe (nach [20]). \* Subkutane Applikation von Trastuzumab mit Einweg-Injektionsgerät.

die Patientinnen in 80,3% die Zeitersparnis gefolgt von weniger Schmerzen mit 34,3% (● **Tab. 1**) [19].

Auch das medizinische Fachpersonal bevorzugte die subkutane Applikationsform. 181 von 235 befragten medizinischen Fachkräften waren mit der s.c. Gabe zufriedener als mit der intravenösen Gabe (77%, 95%-KI 71,1–82,2%). 7 von 235 (3,0%, 95%-KI 1,2–6,0%) bevorzugten die intravenöse Gabe. 47 von 235 (20%, 95%-KI 15,1–25,7%) hatten keine Präferenz für eine der beiden Applikationsformen [19].

### PrefHer – Time-and-Motion-Substudie

Die Time-and-Motion-Studie wurde als nicht interventionelle Substudie der PrefHer-Studie durchgeführt. Ihr Ziel war die prospektive Erhebung vergleichender Daten zur effektiven Behandlungszeit der Patientinnen, der sogenannten „Patient Chair Time“, und für den Zeitbedarf des medizinischen Fachpersonals für die verschiedenen Applikationsformen von Trastuzumab. An dieser Substudie nahmen 17 Zentren aus Kanada, Dänemark, Frankreich, Russland, Spanien und der Schweiz teil [19,20].

Die Ergebnisse unterschieden sich z.T. deutlich in den teilnehmenden Ländern. Dennoch war in allen Zentren die „Patient Chair Time“ unter Trastuzumab s.c. erheblich geringer als mit Trastuzumab i.v. Die absolute Zeitersparnis pro Sitzung lag zwischen 34 Minuten (Russland) und 95 Minuten (Schweiz), die relative zwischen 68% (Kanada) und 80% (Schweiz) (● **Abb. 3**). Bezogen auf den Zeitbedarf für 10 Patientinnen pro Jahr lag die errechnete Ersparnis zwischen 103 Stunden (Russland) und 284 Stunden (Schweiz) [20].

Die aktive Healthcare Professional (HCP) Time umfasste den Zeitaufwand für alle Tätigkeiten des Personals, die insgesamt für die Verabreichung von Trastuzumab notwendig waren. Auch hier zeigte sich in allen Ländern ein deutlich geringerer Zeitaufwand für Trastuzumab s.c. gegenüber Trastuzumab i.v. Die absolute Zeitersparnis lag pro Sitzung zwischen 7,4 Minuten (Dänemark)

und 18,7 Minuten (Kanada), die relative zwischen 30% (Schweiz) und 51% (Spanien). Hochgerechnet auf eine Therapiedauer von 1 Jahr mit 18 Zyklen lag die Zeitersparnis zwischen 2,3 Stunden (Dänemark) und 5,5 Stunden (Kanada) pro Patientin (● **Abb. 4**) [20]. Beide Formen der subkutanen Applikation, mit Einweg-Injektionsgerät oder konventionell mit Spritze, resultierten in einem geringeren Zeitbedarf für die Stuhlbelegung und die aktive HCP Time und unterschieden sich nicht voneinander [21].

Die Studie beinhaltete neben der Erfassung quantitativer Daten auch eine Erhebung der Beurteilung des medizinischen Fachpersonals zum empfundenen qualitativen Nutzen durch eine Umstellung von Trastuzumab i.v. auf Trastuzumab s.c. Danach war die Umstellung mit Vorteilen für Patientinnen, Pflegepersonal, Ärzte und das Zentrum insgesamt verbunden, wobei der Benefit für die Patientinnen am höchsten empfunden wurde [22].

### Erfahrungen mit der Anwendung von Trastuzumab s.c. in deutschen Zentren

Erfahrungen aus anderen Gesundheitssystemen sind nur bedingt auf die deutsche Realität übertragbar. Deutsche Zentren nahmen zwar an der PrefHer-Studie, jedoch nicht an der Time-and-Motion-Substudie teil. Daher sollte ein Projekt mit 7 deutschen Zentren, in denen Trastuzumab s.c. seit der Einführung regelmäßig und erfolgreich eingesetzt wird, einen qualitativen Eindruck von dessen Anwendung in der klinischen Routine vermitteln. Pro Zentrum, dem Brustzentrum des Sana-Klinikums Offenbach, der Klinik für Gynäkologie des Universitätsklinikums Hamburg-Eppendorf, der Frauenklinik des Städtischen Klinikums Lüneburg, der Klinik für Frauenheilkunde und Geburtshilfe der Medizinischen Hochschule Hannover, der Frauenklinik des Universitätsklinikums Magdeburg, der Frauenklinik des Städtischen Klinikums Karlsruhe, des Zentrums für ambulante Therapie in der gynäkologischen Onkologie der Kliniken Essen-Mitte, wurde ein ärztlicher Vertreter in verantwortlicher Position bei der ambu-

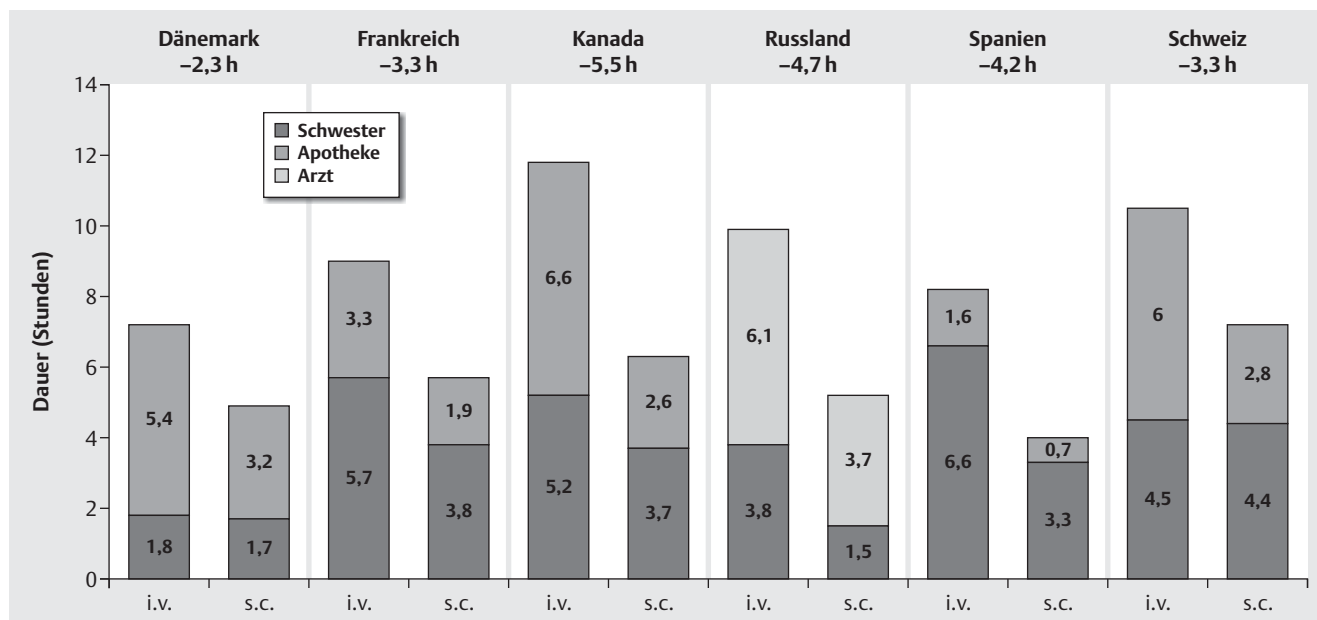

**Abb. 4** Active Healthcare Professional (HCP) Time für die Behandlung einer Patientin mit Trastuzumab über 1 Jahr – s.c. Gabe\* vs. i.v. Gabe (nach [20]).

\* Subkutane Applikation von Trastuzumab mit Einweg-Injektionsgerät.

lanten Behandlung onkologischer Patientinnen zu einem nach der Metaplan®-Methode moderierten Workshop eingeladen. Ziel war es, Erfahrungen mit Trastuzumab s.c. außerhalb klinischer Studien zu beschreiben und „Best Practices“ für die Behandlung mit Trastuzumab s.c. abzuleiten. Mit dem Vertreter jedes Zentrums wurde vorab ein strukturiertes Telefoninterview zu 6 Themenkomplexen geführt. Die Ergebnisse dieser qualitativen Interviews wurden zusammengefasst, im Rahmen des moderierten Workshops präsentiert und aufgrund von Nachfragen der Teilnehmer ergänzt.

### Warum die Zentren Trastuzumab s.c. einführen

Die Gründe für die Einführung von Trastuzumab s.c. in den Zentren waren vielfältig. Bei allen Zentren stand jedoch der erwartete Nutzen für die Patientinnen im Vordergrund.

Vier Zentren hatten bereits vor der Zulassung praktische Erfahrung in der Anwendung von Trastuzumab s.c. im Rahmen klinischer Studien gesammelt. Die Ergebnisse der HannaH- und der PreffHer-Studie waren ausschlaggebend für die Einführung von Trastuzumab s.c. in 2 weiteren Zentren.

Die Umstellung erfolgte in allen Zentren in enger Absprache mit ihrer zuständigen Apotheke. In einem Fall ging die Initiative zur Umstellung auf Trastuzumab s.c. direkt vom Apotheker aus, der darin die Chance sah, notwendige Valenzen für die überlastete Zytostatikazubereitung zu erreichen. Auch in mehreren anderen Zentren trugen Kapazitätsengpässe, wenn auch nicht vorrangig, zur Einführung von Trastuzumab s.c. bei. In einem Fall war mit der Umstellung die Erwartung verbunden, Überstunden des Pflegepersonals im Zentrum durch den geringeren Zeitaufwand der Therapie vermeiden zu können. In 2 Fällen war die Zahl an Plätzen für intravenöse Therapien in Spitzenzeiten nicht ausreichend und eine Entlastung erwünscht.

In den meisten Zentren wurde mit der Umstellung auf Trastuzumab s.c. die Hoffnung auf eine größere Terminflexibilität verbunden.

### Struktur der Zentren

Die Behandlung der Patientinnen mit Trastuzumab s.c. erfolgte in unterschiedlichen Konstellationen: Hochschulambulanz (n = 1), Hochschulambulanz mit teilstationärer Abrechnung (n = 1), Ambulanzen nach § 116b (n = 3), Ambulanz nach § 116b in Kooperation mit einem niedergelassenen Onkologen in gemeinsamen Praxisräumen auf dem Klinikgelände (n = 1), in der Klinik und in Kooperation mit einem niedergelassenen Onkologen mit Praxisräumen auf dem Klinikgelände (n = 1).

Das Patientenaufkommen der befragten Zentren pro Jahr lag zwischen 100–600 Patientinnen mit frühem Mammakarzinom und zwischen 20–180 Patientinnen mit metastasiertem Mammakarzinom.

### Logistik und Zubereitung

Termine für die subkutane Applikation von Trastuzumab wurden in der Regel flexibler vergeben als bei den intravenösen Therapien und auch schon mal „eingeschoben“. Einige Zentren sind inzwischen dazu übergegangen, die Patientinnen, die Trastuzumab s.c. erhalten, erst für den Nachmittag einzubestellen.

In der Regel erfolgt in den Zentren die Bestellung von Trastuzumab s.c. für die einzelne Patientin am Vortag der eigentlichen Therapie. In einem Zentrum wird die Bestellung vorbereitet, jedoch erst am Therapietag nach Vorstellung der Patientin tatsächlich ausgelöst. In einem weiteren Zentrum erfolgt die Bestellung am Therapietag, wenn die Patientin bis 10:00 Uhr ihren Termin nicht abgesagt hat. In einem anderen Zentrum wird die Bestellung bereits 3 Tage vor Therapiebeginn getätigt.

Die Lieferung erfolgt in der Regel durch die hauseigene Apotheke. Dabei wird Trastuzumab s.c. sowohl in zubereiteter Form als aufgezogene Spritze als auch in Form von Ampullen geliefert. In einem Zentrum wurde die Lieferung nach einigen Monaten von Ampullen auf fertig aufgezogene Spritzen umgestellt, in einem anderen von in der Apotheke aufgezogenen Spritzen auf Ampul-

len. Die Umstellungen erfolgten aus spezifischen lokalen organisatorischen Gründen in Absprache mit den beliefenden Apotheken. Wird Trastuzumab s.c. als Ampulle geliefert, wird es vom Personal im Zentrum unmittelbar vor der Applikation aufgezo-gen. In diesen Zentren wird ein Vorrat von 3–5 Ampullen Trastu-zumab s.c. vorgehalten.

Die empfohlene Dosis für die subkutane Darreichungsform von Trastuzumab ist unabhängig vom Körpergewicht der Patientin 600 mg. Unter Einhaltung der Kühlkette bei 2–8 °C beträgt die Haltbarkeit der fertigen Infusionslösung 48 Stunden und danach 6 Stunden bei einer Zimmertemperatur von bis zu 30 °C und dif-fusem Tageslicht [7], sodass die fertig aufgezo-gene Spritze auf-grund der Fixdosierung innerhalb dieser Zeit grundsätzlich auch für eine andere Patientin verwendet werden kann. Daher fällt in den Zentren unabhängig von der Art der Anlieferung als Ampulle oder als fertig aufgezo-gene Spritze bei einem entsprechenden Pa-tientenaufkommen kein Verwurf an.

### Applikation

Trastuzumab s.c. wird alle 3 Wochen über 2–5 Minuten subkutan verabreicht. Die Applikation der Spritze ist in den Zentren häufig Aufgabe der Pflegekräfte, in manchen Zentren ärztliche Aufgabe. In 2 Zentren wird Trastuzumab s.c. je nach Verfügbarkeit sowohl von Ärzten als auch von Pflegekräften verabreicht. Für die Appli-kation wird in den Zentren kein gesonderter Raum vorgehalten. In keinem der Zentren konnte ein Einweg-Injektionsgerät einge-setzt werden, da dies noch nicht für die klinische Routine zur Verfügung stand.

### Welche Patientinnen werden mit Trastuzumab s.c. behandelt?

Grundsätzlich werden in den Zentren außerhalb von Studien je-der Patientin, bei der eine Therapie mit Trastuzumab indiziert ist, beide Applikationsformen angeboten. Die Patientin trifft letztlich die Entscheidung darüber, ob sie mit Trastuzumab i.v. oder s.c. behandelt werden möchte. Ausnahmen hiervon gibt es nur in wenigen Fällen. So wird von 3 Zentren bei einzelnen Hochrisiko-patientinnen mit kardiovaskulären Risikofaktoren eine wöchent-liche Gabe von intravenös verabreichtem Trastuzumab bevor-zugt. Dies ermöglicht ein engeres Monitoring und erlaubt poten-ziell rascher eine Intervention beim Auftreten kardialer Neben-wirkungen. In einem Zentrum wird auch bei Patientinnen mit schweren dermatologischen Erkrankungen wie z.B. einer Psoria-sis eher von der subkutanen Therapieform abgesehen.

Alle befragten Zentren präferieren Trastuzumab s.c., wenn par-allel keine weitere medikamentöse Therapie intravenös ver-abreicht wird.

Bei Patientinnen, die zusätzlich zu Trastuzumab eine Chemothe-rapie oder eine weitere Antikörpertherapie intravenös erhalten, wird Trastuzumab, insbesondere bei liegendem zentralnervösen Port, zumeist auch intravenös appliziert, obgleich auch in dieser Situation eine deutliche Verkürzung der Verweildauer der Pa-tientin im Zentrum erreicht werden könnte. Der Vermeidung einer zusätzlichen Injektion und damit Punktion wird Vorrang vor der möglichen Zeitersparnis eingeräumt. Nur in einem der befragten Zentren wird Trastuzumab s.c. auch schon während der Chemotherapiephase verabreicht, wenn die Patientin dies wünscht.

Die Umstellung von Patientinnen unter laufender Trastuzumab-Therapie wurde von den Zentren unterschiedlich gehandhabt. In 3 Zentren wurde eine konsequente Umstellung aller Patientin-nen mit Trastuzumab-Monotherapie auf Trastuzumab s.c. ange-strebt. Wenige Patientinnen wünschten diese Umstellung aller-dings nicht. In einem Zentrum wurde mit Patientinnen eine Test-phase vereinbart, nach der sie wieder zu Trastuzumab i.v. hätten wechseln können. Allerdings wollten alle Patientinnen die sub-kutane Applikation beibehalten. In den anderen Zentren wurde bei Patientinnen mit laufender Trastuzumab-Therapie die intra-venöse Applikation beibehalten. Eine Umstellung erfolgte nur, wenn die Patientin aktiv den Wunsch danach äußerte.

### Erfahrungen der Zentren nach mehr als einem Jahr Anwendung von Trastuzumab s.c.

Die Akzeptanz der Patientinnen für Trastuzumab s.c. ist auch in der Routineversorgung in den 7 Zentren sehr hoch. Die Mehrheit der Patientinnen (70–90%), denen beide Anwendungsformen an-geboten wurden, entschied sich für Trastuzumab s.c. Bei sehr gu-ter Compliance waren ihre Rückmeldungen durchweg positiv. Die Zeitersparnis stand an erster Stelle. Dabei fühlten sich die Pa-tientinnen anders als bei oral verabreichten Therapien dennoch eingebunden und betreut. Sie schätzten die Flexibilität bei der Terminvergabe, die es ihnen besser ermöglicht, die Therapie in ihren Lebensalltag zu integrieren, z.B. mit der Applikation früh-morgens vor Arbeitsbeginn. Gleichzeitig wecken diese Erfahrun-gen aber auch Ansprüche auf einen noch schnelleren Ablauf, z.B. eine Applikation, ohne ein Arztgespräch abwarten zu müssen. In den Zentren wird auch zunehmend eine aktive Nachfrage nach Trastuzumab s.c. vonseiten der Patientinnen wahrgenommen, die möglicherweise auf dem Erfahrungsaustausch im Zentrum und in Internetforen beruht.

Auch die Erfahrungen des medizinischen Personals im Zentrum waren nach den qualitativen Interviews positiv. Von den meisten wird die Handhabung von Trastuzumab s.c. als einfacher emp-funden, wobei die Hemmschwelle für eine subkutane Injektion deutlich niedriger liegt als beim Anstechen eines Ports. Der tat-sächliche kumulative Arbeitsaufwand und Zeitbedarf des Per-sonals für alle mit der Trastuzumab-Gabe verbundenen Tätigkei-ten unterschied sich nach Erfahrung der befragten Zentren nicht nennenswert bei subkutaner und intravenöser Darreichungs-form. Weil Trastuzumab s.c. eine höhere Flexibilität bei der Ter-minvergabe erlaubt, half die Umstellung von i.v. auf s.c. aber, den Arbeitsalltag im Zentrum zu entzerren. Kapazitäten bei den Plät-zen für die intravenösen Therapien wurden frei. Allein aufgrund dieser Flexibilität konnten Überstunden vermieden und Per-sonalkosten stabil gehalten werden. Die Situation wurde bei en-ger Personaldecke entspannt. Aufgrund der bestehenden Abrech-nungsregeln und der geringeren Vergütung für die subkutane Therapie kann die Umstellung auf Trastuzumab s.c. allerdings auch zu realen Einkommenseinbußen im Vergleich zur intra-venösen Trastuzumabgabe führen.

Das derzeitige Abrechnungswesen bildet die Vorteile der sub-kutanen Applikation im Vergleich zur intravenösen Injektion nicht ausreichend ab. Wie hoch die finanzielle Einbuße pro Pa-tient tatsächlich ist, hängt von der geltenden Abrechnungs-modalität ab, die wiederum an die zuständige Kassenärztliche Vereinigung gebunden ist. Der einheitliche Bewertungsmaßstab (EBM) sieht eine Vergütung gemäß EBM-Ziffer 02101 von 16,13 € für eine intravenöse Verabreichung von Trastuzumab pro Infu-

sionstag vor. Bei einer Berechtigung für die zusätzliche Abrechnung gemäß Onkologie-Vereinbarung (OV) können gemäß OV-Ziffer 86516 zwischen 141,27–255,65 € (je nach KV-Zugehörigkeit) im Quartal pro Patientin, die mit Trastuzumab i. v. behandelt wird, abgerechnet werden. Erhält eine Patientin Trastuzumab s. c., entfällt die Möglichkeit der Abrechnung gemäß EBM-Ziffer 02101 und OV-Ziffer 8651.

Als wünschenswerte Vorbilder in Sachen Vergütungssystem sind die Bundesländer Sachsen und Thüringen zu sehen, die schon seit einigen Jahren eine eigene Ziffer für die Abrechnung von oralen onkologischen Therapien haben. Eine Ergänzung dieser oralen Ziffer um die Abrechnung von subkutanen onkologischen Therapien ist in Sachsen Anfang dieses Jahres erfolgt und in Thüringen aktuell im Gespräch.

## Diskussion

Die Erfahrungen, die in den 7 Zentren mit der Anwendung von Trastuzumab s. c. gemacht wurden, decken sich in vielen Punkten mit den Ergebnissen der PreHer-Studie. Bei den Patientinnen bestand eine klare Präferenz für die subkutane Anwendung von Trastuzumab. Dabei hatten sie meist zuvor parallel zur Chemotherapie Trastuzumab i. v. erhalten und konnten so einen Vergleich zwischen beiden Applikationsformen ziehen. Wie in der Time-and-Motion-Studie wurde mit Trastuzumab s. c. eine Zeitersparnis für die Patientin realisiert. Dabei muss bemerkt werden, dass die Befragung der Zentren keine quantitativen, sondern nur qualitative Aussagen erlaubte. Die Zeitersparnis wurde von den Patientinnen als größter Vorteil wahrgenommen. Sie schätzten auch die daraus resultierende höhere Terminflexibilität, die ihnen trotz langandauernder systemisch onkologischer Therapie wieder ein selbstbestimmteres Leben ermöglichte.

Für die Zentren fiel die Bilanz nach mehr als einem Jahr Trastuzumab s. c. insgesamt positiv aus (● Tab. 2). Ihre Erwartungen an mehr Flexibilität wurden erfüllt. Der klare Vorteil für die Patientinnen und deren Zufriedenheit standen im Vordergrund. Trastuzumab s. c. verschaffte den Zentren durch die größere Terminflexibilität trotz unverändert angespannter Personalsituation mehr Gestaltungsraum. Das ist insofern von großer Bedeutung, als die ambulante onkologische Therapie für die Zentren aufgrund verschiedener Faktoren wie der zunehmenden Komplexität onkologischer Therapien und auch den Herausforderungen durch eine dünne Personaldecke und einer strikteren Befolgung der Arbeitszeitregelungen schwieriger geworden ist. Wichtige Argumente für die Umstellung auf Trastuzumab s. c. waren für die Zentren auch Sicherheitsaspekte. So können mit der Anwendung einer Fixdosis Dosierungsfehler ausgeschlossen werden. Darüber hinaus wird bei der Therapie mit Trastuzumab s. c. immer ein Originalwirkstoff mit dem bekannten Wirksamkeits- und Verträglichkeitsprofil eingesetzt. In der klinischen Anwendung waren keine Unterschiede hinsichtlich Wirksamkeit und Verträglichkeit zwischen Trastuzumab i. v. und Trastuzumab s. c. aufgefallen, insbesondere keine Häufung von SAEs. Allerdings muss einschränkend bemerkt werden, dass diese Einschätzung auf subjektiven Beobachtungen beruht und nicht Ergebnis einer systematischen Analyse von Patientendaten ist. Letztlich würden sich alle der 7 befragten Zentren heute wieder für eine Umstellung auf Trastuzumab s. c. entscheiden.

Allerdings sehen sie dringenden Handlungsbedarf hinsichtlich einer gerechteren Vergütung. Moderne onkologische Therapien werden immer häufiger nicht intravenös, sondern oral oder sub-

**Tab. 2** Bilanz Chancen und Herausforderungen bei der Umstellung von einer intravenösen auf eine subkutane oder orale Applikationsform.

| Pro                                                                                                                                                                                                                                                                                                                                                                                                                                                                        | Contra                                                                                                                                                                                          |
|----------------------------------------------------------------------------------------------------------------------------------------------------------------------------------------------------------------------------------------------------------------------------------------------------------------------------------------------------------------------------------------------------------------------------------------------------------------------------|-------------------------------------------------------------------------------------------------------------------------------------------------------------------------------------------------|
| <b>Patientin</b>                                                                                                                                                                                                                                                                                                                                                                                                                                                           |                                                                                                                                                                                                 |
| <ul style="list-style-type: none"> <li>▶ Zeitersparnis</li> <li>▶ flexiblere Terminvergabe</li> <li>▶ bessere Integration der Therapie im Alltag</li> <li>▶ Originalwirkstoff mit überprüfem Wirksamkeits- und Verträglichkeitsprofil</li> <li>▶ Ausschluss von Dosierungsfehlern</li> <li>▶ äquivalente Wirksamkeit und Verträglichkeit von Trastuzumab s. c. und Trastuzumab i. v.</li> </ul>                                                                            | <ul style="list-style-type: none"> <li>▶ Steuerbarkeit bei kardialer Hochrisikopatientin</li> </ul>                                                                                             |
| <b>Zentrum</b>                                                                                                                                                                                                                                                                                                                                                                                                                                                             |                                                                                                                                                                                                 |
| <ul style="list-style-type: none"> <li>▶ Ausschluss von Dosierungsfehlern</li> <li>▶ Vermeidung von Verwurf</li> <li>▶ flexiblere Terminvergabe</li> <li>▶ Entzerrung des Arbeitsalltags</li> <li>▶ Vermeidung von Überstunden</li> <li>▶ Ausgleich von Personalengpässen</li> <li>▶ freie Kapazitäten bei i. v. Therapieplätzen</li> <li>▶ Wettbewerbsvorteil gegenüber Zentren, die Patientinnen Komfort durch zeitsparendes Trastuzumab s. c. nicht anbieten</li> </ul> | <ul style="list-style-type: none"> <li>▶ identischer Gesamtarbeits- und Zeitbedarf unabhängig von Applikationsform</li> <li>▶ geringere Vergütung der Therapie mit Trastuzumab s. c.</li> </ul> |

kutan verabreicht. Der Zeitbedarf für die tatsächliche Applikation mag sich dadurch verkürzen. Doch das medizinische Fachpersonal muss auch bei diesen Therapien zeitintensive Leistungen erbringen wie z. B. ausführliche Aufklärungsgespräche oder das Monitoring von Nebenwirkungen, die in der Vergütungsstruktur nicht ausreichend abgebildet werden. Hier offenbart sich ein Dilemma. Auf der einen Seite ist es problematisch, dass Patientinnen neue Therapieoptionen und die Chance auf eine bessere Lebensqualität aus betriebswirtschaftlichen Gründen nicht angeboten werden, weil das Zentrum z. B. im Falle von Trastuzumab die herkömmliche intravenöse Gabe besser abrechnen kann. Auf der anderen Seite darf ein Zentrum, wenn es modernere und für die Patientinnen komfortablere Therapien anbietet, dafür nicht mit finanziellen Einbußen bestraft werden, weil bestehende Gebührenordnungspositionen eine Abrechnung von hierfür notwendigen Leistungen nicht vorsehen. Nach Zahlen aus dem Dezember 2014 machte die subkutane Applikationsform von Trastuzumab in Deutschland nur 14,0% des insgesamt verabreichten Trastuzumabs aus. Im gleichen Zeitraum lag der Anteil in Frankreich bei 23,7%, in Großbritannien bei 60,1% und in Schweden sogar bei 76,4% [23]. In diesen Ländern unterscheiden sich die Strukturen der onkologischen Versorgung und die Vergütungssysteme von denen in Deutschland. Für diese unterschiedliche Akzeptanz der neuen Applikationsform von Trastuzumab trotz nachgewiesener Wirksamkeit, Präferenz der Patientinnen und zeitgleicher Verfügbarkeit kann man sicher verschiedene Gründe anführen. Doch die Zahlen belegen auch, dass der Zugang der Patientinnen zu modernen onkologischen Therapien maßgeblich von bestehenden Vergütungssystemen beeinflusst wird.

## Fazit

Angesichts des zunehmenden Wandels der onkologischen Therapie ist eine systematische Überprüfung der ambulanten Vergütungsstrukturen und eine angemessene Abbildung von Abrechnungsmöglichkeiten für die moderne ambulante onkologische Therapie dringend notwendig.

## Interessenkonflikt

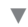

Die Autoren erklären, dass innerhalb der vergangenen 3 Jahre folgende Tätigkeiten oder Unterstützungen vorlagen: CJ Referentenhonorare und Reisekostenunterstützung von Roche; VM Berater-tätigkeit für und Referentenhonorare von Amgen, Celgene, Eisai, Pierre Fabre, Roche sowie Forschungsunterstützung von Celgene und Roche; PD Referentenhonorare und Reisekostenunterstützung von Roche; RN Referentenhonorar von Roche; T-W P-S Beratertätigkeit für und Referentenhonorare von Roche; SS Bera-ter-tätigkeit für und Referentenhonorare von Astra-Zeneca, GSK, Novartis, Riemser, Roche, TEVA; HT Beratertätigkeit für und Referentenhonorare von Roche; BA Beratertätigkeit für und Referen-tenhonorare von Roche.

## Institute

- <sup>1</sup> Klinik für Gynäkologie und Geburtshilfe, Sana Klinikum Offenbach, Offenbach
- <sup>2</sup> Frauenklinik, Universitätsklinikum Hamburg-Eppendorf, Hamburg
- <sup>3</sup> Frauenklinik, Städtisches Klinikum Lüneburg, Lüneburg
- <sup>4</sup> Frauenklinik, Universitätsklinikum Magdeburg, Magdeburg
- <sup>5</sup> Klinik für Frauenheilkunde und Geburtshilfe, Medizinische Hochschule Han-nover, Hannover
- <sup>6</sup> Frauenklinik, Städtisches Klinikum Karlsruhe, Karlsruhe
- <sup>7</sup> Onkologische Gemeinschaftspraxis am Bethanien-Krankenhaus, Frankfurt
- <sup>8</sup> Gynäkologie und Gynäkologische Onkologie, Kliniken Essen-Mitte, Essen

## Literatur

- 1 Giordano SH, Temin S, Kirshner JJ et al. Systemic therapy for patients with advanced human epidermal growth factor receptor 2-positive breast cancer: American Society of Clinical Oncology clinical practice guideline. *J Clin Oncol* 2014; 32: 2078–2099
- 2 Senkus E, Kyriakides S, Penault-Llorca F et al.; ESMO Guidelines Working Group Primary breast cancer. ESMO Clinical Practice Guidelines for diagnosis, treatment and follow-up. *Ann Oncol* 2013; 24 (Suppl. 6): vi7–vi23
- 3 Cardoso F, Costa A, Norton L et al. ESO-ESMO 2nd international consen-sus guidelines for advanced breast cancer (ABC2)†. *Ann Oncol* 2014; 25: 1871–1888
- 4 DKG. Interdisziplinäre S3-Leitlinie für die Diagnostik, Therapie und Nachsorge des Mammakarzinoms Langversion 3.0, Aktualisierung 2012. Online: [http://www.krebsgesellschaft.de/download/S3\\_Brust-krebs\\_Update\\_2012\\_OL\\_Langversion.pdf](http://www.krebsgesellschaft.de/download/S3_Brust-krebs_Update_2012_OL_Langversion.pdf); Stand: 03.03.2015
- 5 AGO. Diagnostik und Therapie von Patientinnen mit primärem und metastasiertem Brustkrebs: Version 2015. 1D [online] 03.2015. On-line: [http://www.ago-online.de/fileadmin/downloads/leitlinien/mamma/maerz2015/de/2015D\\_Alle\\_aktuellen\\_Empfehlungen.pdf](http://www.ago-online.de/fileadmin/downloads/leitlinien/mamma/maerz2015/de/2015D_Alle_aktuellen_Empfehlungen.pdf); Stand: 03.03.2015
- 6 Aktuelle Fachinformation Herceptin®, April 2015
- 7 Aktuelle Fachinformation Herceptin® SC, April 2015
- 8 Haller F. Converting intravenous dosing to subcutaneous dosing with recombinant human hyaluronidase. *Pharm Tech* 2007; 10: 861–864
- 9 Watson D. Hyaluronidase. *Br J Anaesth* 1993; 71: 422–425
- 10 Bookbinder LH, Hofer A, Haller MF et al. A recombinant human enzyme for enhanced interstitial transport of therapeutics. *J Control Release* 2006; 114: 230–241
- 11 Frost GI. Recombinant human hyaluronidase (rHuPH20): an enabling platform for subcutaneous drug and fluid administration. *Expert Opin Drug Deliv* 2007; 4: 427–440
- 12 Hourcade-Potelleret F, Lemenuel-Diot A, McIntyre C et al. Use of a popu-lation pharmacokinetic approach for the clinical development of a fixed-dose subcutaneous formulation of trastuzumab. *CPT Pharmacometrics Syst Pharmacol* 2014; 3: e87
- 13 Wynne C, Harvey V, Schwabe C et al. Comparison of subcutaneous and intravenous administration of trastuzumab: a phase I/Ib trial in healthy male volunteers and patients with HER2-positive breast can-cer. *J Clin Pharmacol* 2013; 53: 192–201
- 14 Ismael G, Hegg R, Muehlbauer S et al. Subcutaneous versus intravenous administration of (neo)adjuvant trastuzumab in patients with HER2-positive, clinical stage I–III breast cancer (HannaH study): a phase 3, open-label, multicentre, randomised trial. *Lancet Oncol* 2012; 13: 869–878
- 15 Jackisch C, Kim S, Semiglazov V et al. Subcutaneous versus intravenous formulation of trastuzumab for HER2-positive early breast cancer: up-dated results from the phase III HannaH study. *Ann Oncol* 2015; 26: 320–325
- 16 Jackisch C, Hegg R, Stroyakovskiy D et al. Total pathologic complete response (tpCR) and event-free survival (EFS) with subcutaneous (SC) or intravenous (IV) trastuzumab in HER2-positive early breast cancer (EBC): The HannaH phase III study. *J Clin Oncol* 2015; 33 (Suppl.): Abstr. 585
- 17 Clinicaltrials.gov. Online: <https://clinicaltrials.gov/ct2/show/NCT01566721?term=safeher&rank=1>; Stand: 03.03.2015
- 18 Pivot X, Gligorov J, Müller V et al. Preference for subcutaneous or intra-venous administration of trastuzumab in patients with HER2-positive early breast cancer (PrefHer): an open-label randomised study. *Lancet Oncol* 2013; 14: 962–970
- 19 Pivot X, Gligorov J, Müller V et al. Patients' preferences for subcutaneous trastuzumab versus conventional intravenous infusion for the adju-vant treatment of HER2-positive early breast cancer: final analysis of 488 patients in the international, randomized, two-cohort PrefHer study. *Ann Oncol* 2014; 25: 1979–1987
- 20 De Cock E, Semiglazov V, Lopez-Vivanco G et al. Time savings with tras-tuzumab subcutaneous vs. intravenous administration: a time and motion study. *St. Gallen* 2013, Abstr. P209
- 21 De Cock E, Knoop A, Jacobsen EH et al. Manual injection of subcutaneous trastuzumab vs. intravenous infusion for HER2-positive early breast cancer: a time-and-motion study. *European Cancer Congress* 2013, Amsterdam, Abstr. 1965
- 22 De Cock E, Pan I, Sandoval M et al. Healthcare professionals' perceptions of the impact on clinical management of switching from the intrave-nous to the subcutaneous formulation of trastuzumab. *European Breast Cancer Conference* 2014, Glasgow, Abstr. 42
- 23 Roche Data on file
